# Supplementary material
Source: HighWire-hosted journal article supplement (https://www.cmajopen.ca/highwire/filestream/89978/field_highwire_adjunct_files/1/open-2022-0151-2-at.pdf)
Supplement: open-2022-0151-2-at.pdf [file open-2022-0151-2-at.pdf]

**Appendix 2.** Overview of major trials of aspects of out-of-hospital transfusion which are currently recruiting

| <b>Registration</b>            | <b>Location</b>                   | <b>PICO</b>                                                                                                                                                                                                                                                                                                                                   | <b>Sample size</b>  | <b>Completion</b>        |
|--------------------------------|-----------------------------------|-----------------------------------------------------------------------------------------------------------------------------------------------------------------------------------------------------------------------------------------------------------------------------------------------------------------------------------------------|---------------------|--------------------------|
| <a href="#">NCT05081063</a>    | United States<br>(single site)    | Does the transfusion of low titer O+ whole blood result in a lower number of pRBC equivalents transfused in the first 24 hours compared to component therapy (including red cells and plasma) in adult male trauma patients receiving an emergency blood transfusion?                                                                         | 150<br>(estimated)  | Dec 2023<br>(estimated)  |
| <a href="#">ISRCTN23657907</a> | England<br>(Multiple sites)       | Does the prehospital transfusion of leukocyte-depleted whole blood result in a lower incidence of 24-hour mortality or massive transfusion (received a total of 10 or more units of any blood components in the first 24 hours) compared with component therapy (including red cells and plasma) in patients with major traumatic hemorrhage? | 848<br>(estimated)  | Dec 2024<br>(estimated)  |
| <a href="#">NCT04684719</a>    | United States<br>(multiple sites) | Does prehospital transfusion of low titre group O whole blood result in a lower incidence of 30-day mortality compared with standard care including crystalloid or component therapy in injured patients at risk of hemorrhagic shock?                                                                                                        | 1020<br>(estimated) | Sept 2025<br>(estimated) |
| <a href="#">NCT05638581</a>    | United States<br>(multiple sites) | Does the transfusion of low titre group O whole blood result in a lower incidence of 6-hour mortality compared with separate component therapy (including red cells, plasma, platelets, and cryoprecipitate) in critically injured patients who require large-volume blood transfusions?                                                      | 1100<br>(estimated) | Jun 2027<br>(estimated)  |
